# Supplementary material for: Is COVID-19 vaccine inequality undermining the recovery from the COVID-19 pandemic?
Source: PubMed Central journal article supplement (PMC9126303; doi:10.7189/jogh.12.05020), 2022-05-23
Supplement: jogh-12-05020-s001.pdf [file jogh-12-05020-s001.pdf]

Table A1. Availability of vaccination data by month

|                              | May | June | July | August | September | October | November |
|------------------------------|-----|------|------|--------|-----------|---------|----------|
| Albania                      | X   | X    | X    | X      | X         | X       | X        |
| Angola                       | X   | X    | X    | X      | X         | X       | X        |
| Antigua and Barbuda          | X   | X    | X    | X      | X         | X       | X        |
| Argentina                    | X   | X    | X    | X      | X         | X       | X        |
| Armenia                      | X   | X    | X    | X      | X         | X       | X        |
| Australia                    | X   | X    | X    | X      | X         | X       | X        |
| Austria                      | X   | X    | X    | X      | X         | X       | X        |
| Azerbaijan                   | X   | X    | X    | X      | X         | X       | X        |
| Bahrain                      | X   | X    | X    | X      | X         | X       | X        |
| Bangladesh                   | X   | X    | X    | X      | X         | X       | X        |
| Barbados                     | X   | X    | X    | X      | X         | X       | X        |
| Belarus                      | X   | X    | X    | X      | X         | X       | X        |
| Belgium                      | X   | X    | X    | X      | X         | X       | X        |
| Belize                       | X   | X    | X    | X      | X         | X       | X        |
| Benin                        | X   | X    | X    | X      | X         | X       | X        |
| Bolivia                      | X   | X    | X    | X      | X         | X       | X        |
| Bosnia and Herzegovina       | X   | X    | X    | X      | X         | X       |          |
| Botswana                     | X   | X    | X    | X      | X         | X       | X        |
| Brazil                       | X   | X    | X    | X      | X         | X       | X        |
| Brunei                       | X   | X    | X    | X      | X         | X       | X        |
| Bulgaria                     | X   | X    | X    | X      | X         | X       | X        |
| Burkina Faso                 | X   | X    | X    | X      | X         | X       | X        |
| Cambodia                     | X   | X    | X    | X      | X         | X       | X        |
| Cameroon                     | X   | X    | X    | X      | X         | X       | X        |
| Canada                       | X   | X    | X    | X      | X         | X       | X        |
| Cape Verde                   | X   | X    | X    | X      | X         | X       | X        |
| Chad                         | X   | X    | X    | X      | X         | X       | X        |
| Chile                        | X   | X    | X    | X      | X         | X       | X        |
| Colombia                     | X   | X    | X    | X      | X         | X       | X        |
| Costa Rica                   | X   | X    | X    | X      | X         | X       | X        |
| Croatia                      | X   | X    | X    | X      | X         | X       | X        |
| Cyprus                       | X   | X    | X    | X      | X         | X       | X        |
| Czechia                      | X   | X    | X    | X      | X         | X       | X        |
| Democratic Republic of Congo | X   | X    | X    | X      | X         | X       | X        |
| Denmark                      | X   | X    | X    | X      | X         | X       | X        |
| Djibouti                     | X   |      | X    | X      | X         | X       | X        |
| Dominica                     | X   | X    | X    | X      | X         | X       | X        |
| Dominican Republic           | X   | X    | X    | X      | X         | X       | X        |
| Ecuador                      | X   | X    | X    | X      | X         | X       | X        |
| Egypt                        | X   | X    | X    | X      | X         | X       | X        |
| El Salvador                  | X   | X    | X    | X      | X         | X       | X        |
| Equatorial Guinea            | X   | X    | X    | X      | X         | X       | X        |
| Estonia                      | X   | X    | X    | X      | X         | X       | X        |
| Ethiopia                     | X   | X    | X    | X      | X         | X       | X        |

|               |   |   |   |   |   |   |   |
|---------------|---|---|---|---|---|---|---|
| Finland       | X | X | X | X | X | X | X |
| France        | X | X | X | X | X | X | X |
| Gabon         | X | X | X | X | X | X | X |
| Gambia        |   | X | X | X | X | X | X |
| Georgia       | X | X | X | X | X | X | X |
| Germany       | X | X | X | X | X | X | X |
| Ghana         | X | X | X | X | X | X | X |
| Greece        | X | X | X | X | X | X | X |
| Guatemala     | X | X | X | X | X | X | X |
| Guinea        | X | X | X | X | X | X | X |
| Guinea-Bissau | X | X | X | X | X | X | X |
| Guyana        | X | X | X | X | X | X | X |
| Haiti         | X | X | X | X | X | X | X |
| Honduras      | X | X | X | X | X | X | X |
| Hong Kong     | X | X | X | X | X | X | X |
| Hungary       | X | X | X | X | X | X | X |
| Iceland       | X | X | X | X | X | X | X |
| India         | X | X | X | X | X | X | X |
| Indonesia     | X | X | X | X | X | X | X |
| Iran          | X | X | X | X | X | X | X |
| Iraq          | X | X | X | X | X | X | X |
| Ireland       | X | X | X | X | X | X | X |
| Israel        | X | X | X | X | X | X | X |
| Italy         | X | X | X | X | X | X | X |
| Jamaica       | X | X | X | X | X | X | X |
| Japan         | X | X | X | X | X | X | X |
| Jordan        | X | X | X | X | X | X | X |
| Kazakhstan    | X | X | X | X | X | X | X |
| Kenya         | X | X | X | X | X | X | X |
| Kosovo        | X | X | X | X | X | X | X |
| Kyrgyzstan    | X | X | X | X | X | X | X |
| Laos          | X | X | X | X | X | X | X |
| Latvia        | X | X | X | X | X | X | X |
| Lebanon       | X | X | X | X | X | X | X |
| Liberia       | X | X | X | X | X | X | X |
| Libya         | X | X | X | X | X | X | X |
| Lithuania     | X | X | X | X | X | X | X |
| Macao         | X | X | X | X | X | X | X |
| Malawi        | X | X | X | X | X | X | X |
| Malaysia      | X | X | X | X | X | X | X |
| Maldives      | X | X | X | X | X | X | X |
| Mali          | X | X | X | X | X | X | X |
| Malta         | X | X | X | X | X | X | X |
| Mauritania    | X | X | X | X | X | X | X |
| Mauritius     | X | X | X | X | X | X | X |
| Mexico        | X | X | X | X | X | X | X |

|                       |   |   |   |   |   |   |   |
|-----------------------|---|---|---|---|---|---|---|
| Moldova               | X | X | X | X | X | X | X |
| Mongolia              | X | X | X | X | X | X | X |
| Montenegro            | X | X | X | X | X | X | X |
| Morocco               | X | X | X | X | X | X | X |
| Mozambique            | X | X | X | X | X | X | X |
| Namibia               | X | X | X | X | X | X | X |
| Nepal                 | X | X | X | X | X | X | X |
| Netherlands           | X | X | X | X | X | X | X |
| New Zealand           | X | X | X | X | X | X | X |
| Niger                 | X | X | X | X | X | X | X |
| Nigeria               | X | X | X | X | X | X | X |
| North Macedonia       | X | X | X | X | X | X | X |
| Norway                | X | X | X | X | X | X | X |
| Oman                  | X | X | X | X | X | X | X |
| Pakistan              | X | X | X | X | X | X | X |
| Panama                | X | X | X | X | X | X | X |
| Papua New Guinea      | X |   | X | X | X | X | X |
| Paraguay              | X | X | X | X | X | X | X |
| Peru                  | X | X | X | X | X | X | X |
| Philippines           | X | X | X | X | X | X | X |
| Poland                | X | X | X | X | X | X | X |
| Portugal              | X | X | X | X | X | X | X |
| Qatar                 | X | X | X | X |   |   |   |
| Romania               | X | X | X | X | X | X | X |
| Russia                | X | X | X | X | X | X | X |
| Rwanda                | X | X | X | X | X | X | X |
| Sao Tome and Principe | X | X | X | X | X | X | X |
| Saudi Arabia          |   | X | X | X | X | X | X |
| Senegal               | X | X | X | X | X | X | X |
| Serbia                | X | X | X | X | X | X | X |
| Sierra Leone          | X | X |   | X | X | X | X |
| Singapore             | X | X | X | X | X | X | X |
| Slovakia              | X | X | X | X | X | X | X |
| Slovenia              | X | X | X | X | X | X | X |
| Somalia               | X | X | X | X | X | X | X |
| South Africa          | X | X | X | X | X | X | X |
| South Korea           | X | X | X | X | X | X | X |
| South Sudan           | X | X | X | X | X | X | X |
| Spain                 | X | X | X | X | X | X | X |
| Sri Lanka             | X | X | X | X | X | X | X |
| Sudan                 | X | X | X | X | X | X | X |
| Suriname              | X | X | X | X | X | X | X |
| Sweden                | X | X | X | X | X | X | X |
| Switzerland           | X | X | X | X | X | X | X |
| Taiwan                | X | X | X | X | X | X | X |
| Tajikistan            | X | X | X | X | X | X | X |

|                               |     |     |     |     |     |     |     |
|-------------------------------|-----|-----|-----|-----|-----|-----|-----|
| Thailand                      | X   | X   | X   | X   | X   | X   | X   |
| Trinidad and Tobago           | X   | X   | X   | X   | X   | X   | X   |
| Tunisia                       | X   | X   | X   | X   | X   | X   | X   |
| Turkey                        | X   | X   | X   | X   | X   | X   | X   |
| Ukraine                       | X   | X   | X   | X   | X   | X   | X   |
| United Arab Emirates          |     | X   | X   | X   | X   | X   |     |
| United Kingdom                | X   | X   | X   | X   | X   | X   | X   |
| United States                 | X   | X   | X   | X   | X   | X   | X   |
| Uruguay                       | X   | X   | X   | X   | X   | X   | X   |
| Uzbekistan                    | X   | X   | X   | X   | X   | X   |     |
| Venezuela                     | X   | X   | X   | X   | X   | X   | X   |
| Vietnam                       | X   | X   | X   | X   | X   | X   | X   |
| Zambia                        | X   | X   | X   | X   | X   | X   | X   |
| Zimbabwe                      | X   | X   | X   | X   | X   | X   | X   |
| Number of countries available | 147 | 148 | 149 | 150 | 149 | 149 | 146 |

Table A2. Countries included in the  
Simultaneous Equations Model

|                                 |                          |
|---------------------------------|--------------------------|
| Albania                         | Laos                     |
| Angola                          | Latvia                   |
| Antigua and Barbuda             | Lebanon                  |
| Argentina                       | Liberia                  |
| Armenia                         | Lithuania                |
| Australia                       | Malawi                   |
| Austria                         | Malaysia                 |
| Azerbaijan                      | Maldives                 |
| Bahrain                         | Mali                     |
| Bangladesh                      | Malta                    |
| Barbados                        | Mauritania               |
| Belarus                         | Mauritius                |
| Belgium                         | Mexico                   |
| Belize                          | Moldova                  |
| Benin                           | Mongolia                 |
| Bolivia                         | Montenegro               |
| Botswana                        | Morocco                  |
| Brazil                          | Mozambique               |
| Brunei                          | Namibia                  |
| Bulgaria                        | Nepal                    |
| Burkina Faso                    | Netherlands              |
| Cambodia                        | New Zealand              |
| Cameroon                        | Niger                    |
| Canada                          | Nigeria                  |
| Cape Verde                      | North Macedonia          |
| Chad                            | Norway                   |
| Chile                           | Oman                     |
| Colombia                        | Pakistan                 |
| Costa Rica                      | Panama                   |
| Croatia                         | Papua New Guinea         |
| Cyprus                          | Paraguay                 |
| Czechia                         | Peru                     |
| Democratic Republic of<br>Congo | Philippines              |
| Denmark                         | Poland                   |
| Djibouti                        | Portugal                 |
| Dominican Republic              | Romania                  |
| Ecuador                         | Russia                   |
| Egypt                           | Rwanda                   |
| El Salvador                     | Sao Tome and<br>Principe |
| Equatorial Guinea               | Saudi Arabia             |
| Estonia                         | Senegal                  |
| Ethiopia                        | Serbia                   |
| Finland                         | Sierra Leone             |
| France                          | Singapore                |

|               |                      |
|---------------|----------------------|
| Gabon         | Slovakia             |
| Gambia        | Slovenia             |
| Georgia       | Somalia              |
| Germany       | South Africa         |
| Ghana         | South Korea          |
| Greece        | South Sudan          |
| Guatemala     | Spain                |
| Guinea        | Sri Lanka            |
| Guinea-Bissau | Sudan                |
| Guyana        | Suriname             |
| Haiti         | Sweden               |
| Honduras      | Switzerland          |
| Hungary       | Tajikistan           |
| Iceland       | Thailand             |
| India         | Trinidad and Tobago  |
| Indonesia     | Tunisia              |
| Iran          | Turkey               |
| Iraq          | Ukraine              |
| Ireland       | United Arab Emirates |
| Israel        | United Kingdom       |
| Italy         | United States        |
| Jamaica       | Uruguay              |
| Japan         | Uzbekistan           |
| Jordan        | Venezuela            |
| Kazakhstan    | Vietnam              |
| Kenya         | Zambia               |
| Kyrgyzstan    | Zimbabwe             |
